# Supplementary material for: Electrochemical Kinetics and Detection of Paracetamol by Stevensite-Modified Carbon Paste Electrode in Biological Fluids and Pharmaceutical Formulations
Source: MDPI journal article supplement (doi:10.3390/ijms241411269), 2023-07-10
Supplement: s1 [file s1]

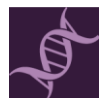

Article

# Electrochemical kinetics and detection of paracetamol by Stevensite-modified carbon paste electrode in biological fluids and pharmaceutical formulations

Moaad Gharous <sup>1,2</sup>, Loubna Bounab <sup>2</sup>, Fernando J. Pereira <sup>3,\*</sup>, Mohamed Choukairi <sup>1,\*</sup>, Roberto López <sup>3</sup> and A. Javier Aller <sup>3</sup>

<sup>1</sup> Laboratory of Materials and Interfacial Systems, Faculty of Science, Abdelmalek Essaadi University, BP 2121, 93002 Tetouan, Morocco.

<sup>2</sup> Research Group of Advanced Materials, Structures and Civil Engineering, National School of Applied Sciences of Tetouan, Abdelmalek Essaadi University, BP 2121, 93002 Tetouan, Morocco.

<sup>3</sup> Department of Applied Chemistry and Physics; Faculty of Biological and Environmental Sciences; Campus de Vegazana, s/n; University of León, E-24071 León, Spain.

\* Correspondence: (FJP): [fjperg@unileon.es](mailto:fjperg@unileon.es); (MC): [mchoukairi@uae.ac.ma](mailto:mchoukairi@uae.ac.ma)

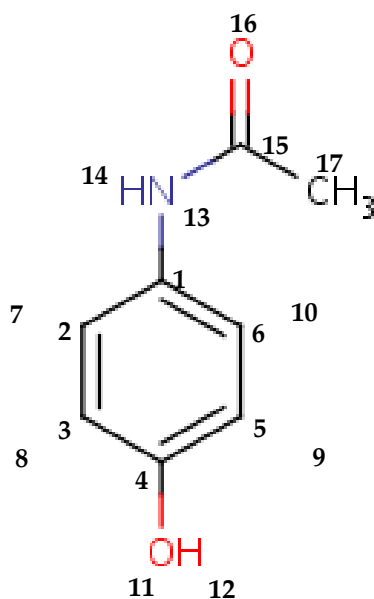

Chemical structure and numeration of the paracetamol molecule.

**Table S1.** Composition of the Stv clay used in this work from XRF spectroscopy.

| Composi-<br>tion | SiO <sub>2</sub> | Al <sub>2</sub> O <sub>3</sub> | TiO <sub>2</sub> | CaO        | K <sub>2</sub> O | Na <sub>2</sub> O | P <sub>2</sub> O <sub>5</sub> | Cr <sub>2</sub> O <sub>3</sub> | SrO         | SO <sub>3</sub> | Fe <sub>2</sub> O <sub>3</sub> | MnO         | MgO        |
|------------------|------------------|--------------------------------|------------------|------------|------------------|-------------------|-------------------------------|--------------------------------|-------------|-----------------|--------------------------------|-------------|------------|
| Mass %           | 69.048           | 4.656                          | 0.397            | 1.360      | 1.291            | 0.216             | 0.573                         | 0.014                          | 0.191       | 0.098           | 3.251                          | 0.026       | 18.878     |
|                  | ±<br>0.203       | ±<br>0.033                     | ±<br>0.002       | ±<br>0.006 | ±<br>0.006       | ±<br>0.053        | ±<br>0.004                    | ±<br>0.0001                    | ±<br>0.0005 | ±<br>0.002      | ±<br>0.0096                    | ±<br>0.0004 | ±<br>0.226 |

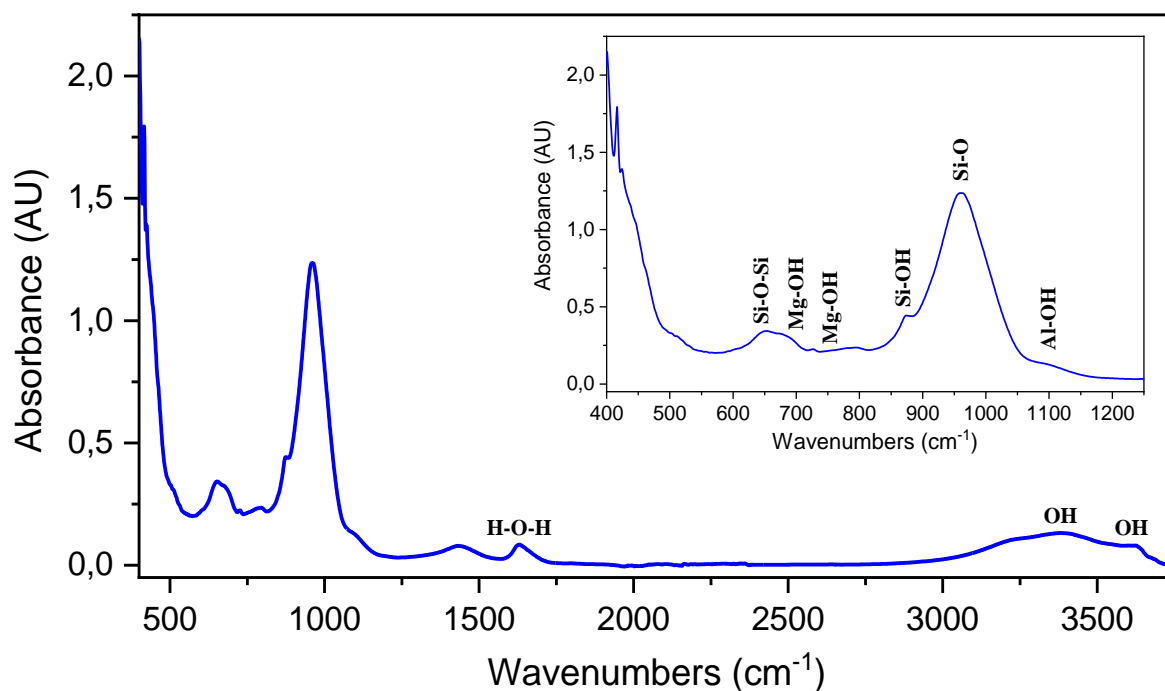**Fig. S1.** FT-IR spectrum of Rhassoul clay mineral.

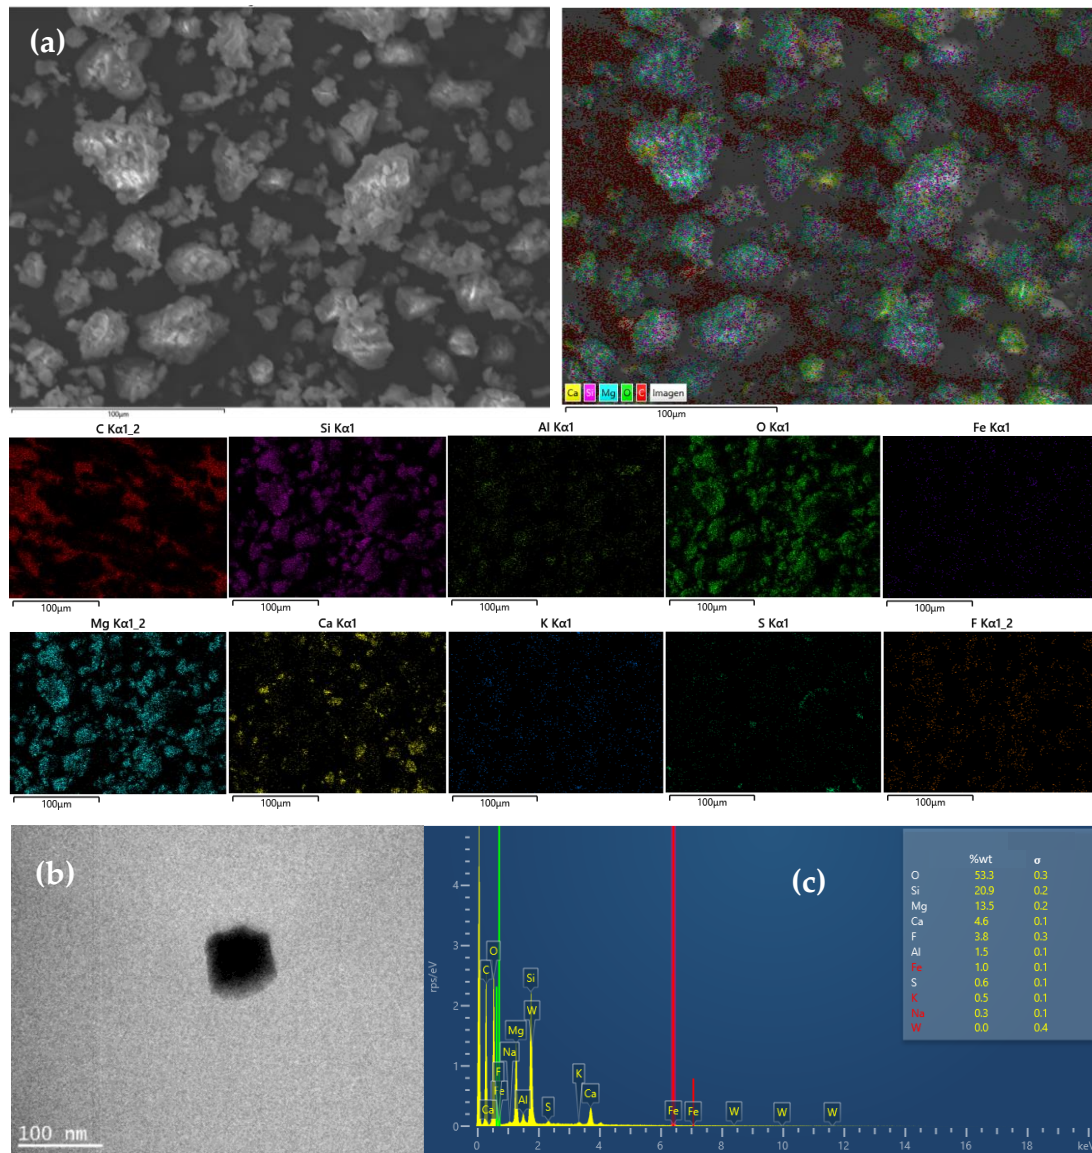

**Fig. S2.** (a) SEM micrograph showing the distribution of several elements. (b) EDS spectrum of the Rhassoul clay mineral. (c) TEM micrograph of the Rhassoul clay mineral.

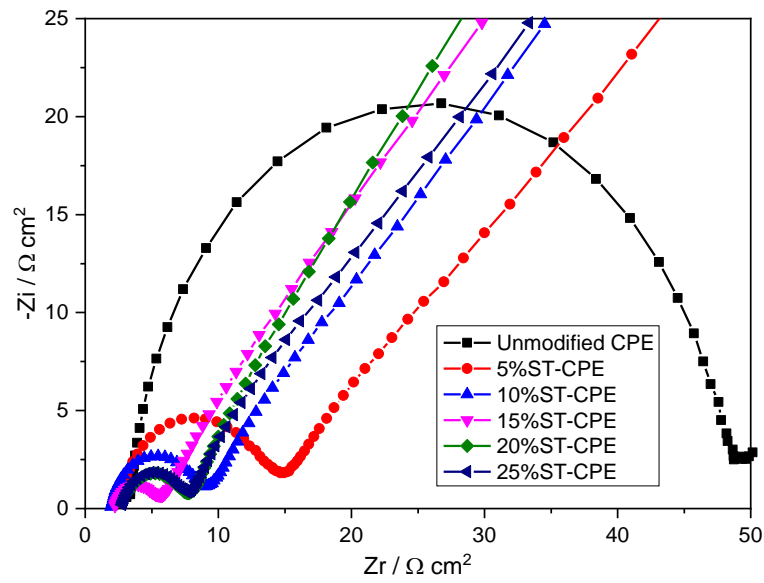

**Fig. S3.** Nyquist diagram of unmodified CPE and Stv-CPE for the oxidation of 0.01 M  $[\text{Fe}(\text{CN})_6]^{3-/4-}$  in 0.5 M KCl.

**Table S2.** Experimental values of load transfer resistance and capacitance of unmodified CPE and (0-25%) Stv-CPE for the oxidation of ferro-ferri as a standard material.

| Samples        | $R_e / \Omega \text{ cm}^2$ | $R_{ct} / \Omega \text{ cm}^2$ | $Q_{dl} / \mu\text{F s}^{n-1}$ | $n$            |
|----------------|-----------------------------|--------------------------------|--------------------------------|----------------|
| Unmodified CPE | 3.345                       | 45.03                          | 06.68                          | 0.947 9        |
| 05%            | 2.459                       | 11.89                          | 44.89                          | 0.847 5        |
| 10%            | 1.936                       | 06.94                          | 59.23                          | 0.846 1        |
| <b>15%</b>     | <b>2.166</b>                | <b>03.40</b>                   | <b>129.8</b>                   | <b>0.792 5</b> |
| 20%            | 2.715                       | 04.93                          | 105.8                          | 0.818 2        |
| 25%            | 2.769                       | 04.89                          | 127.2                          | 0.801 8        |

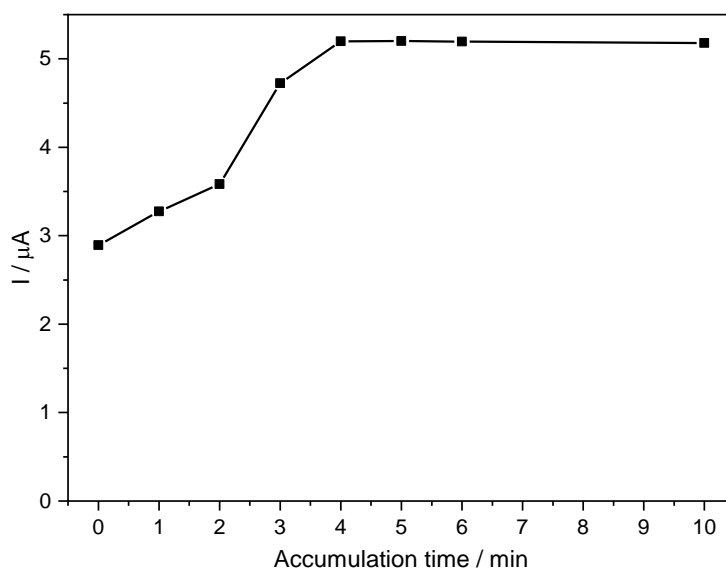

**Fig. S4.** Effect of accumulation time for 100  $\mu\text{M}$  of PCT in PBS (0.1 M, pH 6.7).

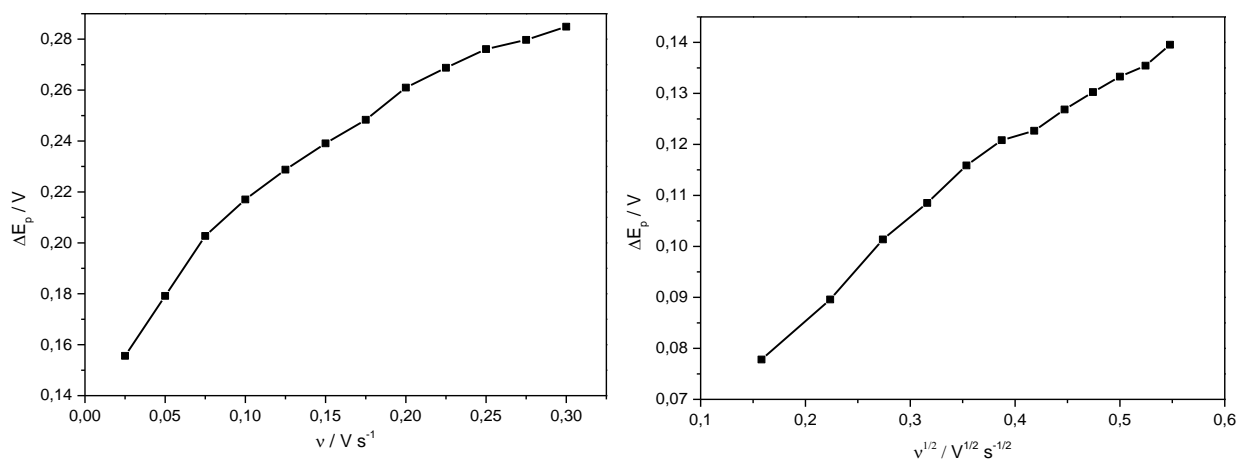

**Fig. S5.** Peak-to-peak separation potential vs scan rate (left) and scan rate's square root (right).

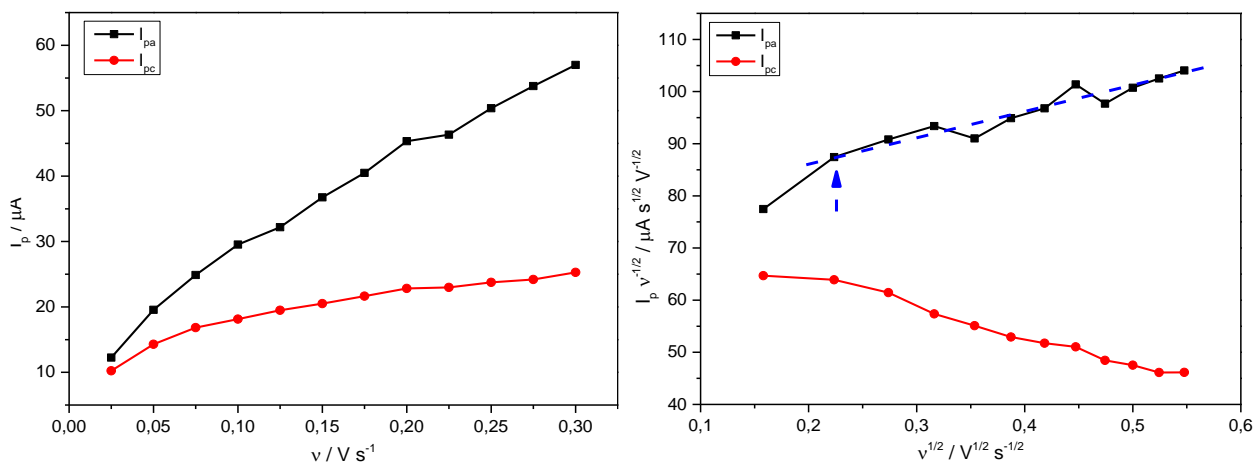

**Fig. S6.** Anodic and cathodic peak intensity vs scan rate (left) and anodic and cathodic peak intensity and scan rate's square root ratio ( $I_p/\sqrt{v}$ ) vs scan rate's square root (right).

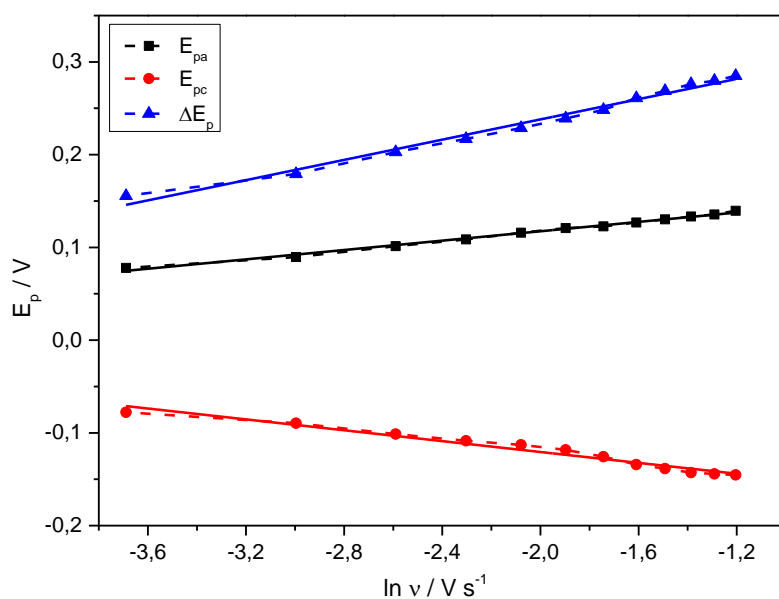

**Fig. S7.** Anodic and cathodic peak potentials, and peak-to-peak separation potential vs  $\ln(\nu)$ .

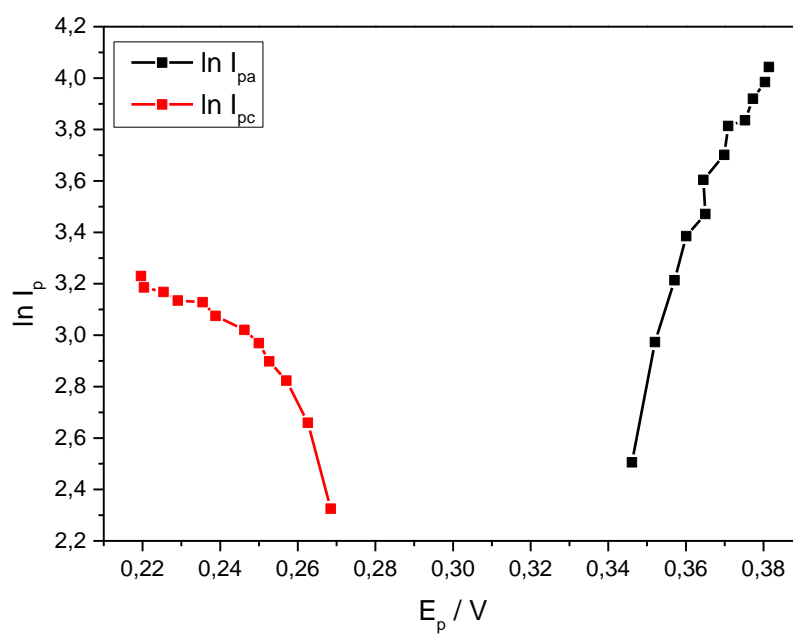

**Fig. S8.**  $\ln(I_p)$  vs the peak potential  $E_p$ .

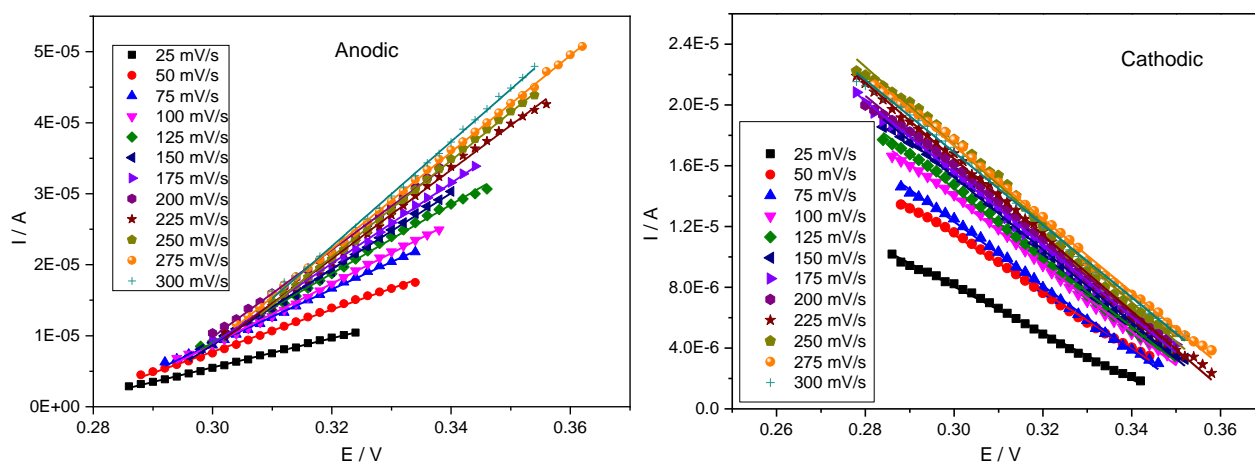

**Fig. S9.** Plots of intensity (anodic and cathodic) vs potential around the equilibrium situation.

**Table S3.** Values of  $D$  for the anodic ( $D_a$ ) and cathodic ( $D_c$ ) processes ( $A = 0.5 \text{ cm}^2$ ).

| $D_a, \text{cm}^2 \text{s}^{-1}$ | $D_c, \text{cm}^2 \text{s}^{-1}$ |
|----------------------------------|----------------------------------|
| 2.45E-05                         | 2.41E-05                         |
| 2.64E-05                         | 2.27E-05                         |
| 2.77E-05                         | 2.20E-05                         |
| 2.73E-05                         | 2.15E-05                         |
| 2.88E-05                         | 2.19E-05                         |
| 2.88E-05                         | 2.16E-05                         |
| 2.84E-05                         | 2.13E-05                         |
| 2.87E-05                         | 2.07E-05                         |
| 2.89E-05                         | 2.18E-05                         |
| 2.89E-05                         | 2.13E-05                         |
| 3.00E-05                         | 2.14E-05                         |
| 2.96E-05                         | 2.17E-05                         |

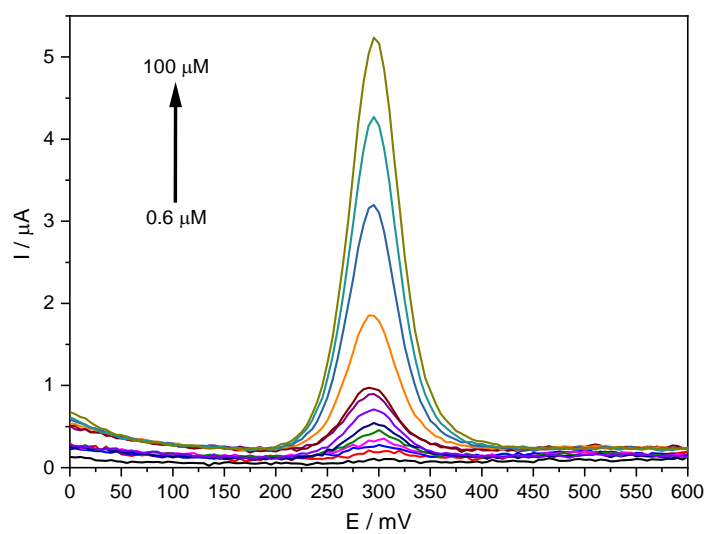

**Fig. S10.** Differential pulse voltammograms of various PCT concentrations [0.6 μM – 100 μM] solutions in PBS (0.1 M, pH 6.7) employing the Stv-CPE.

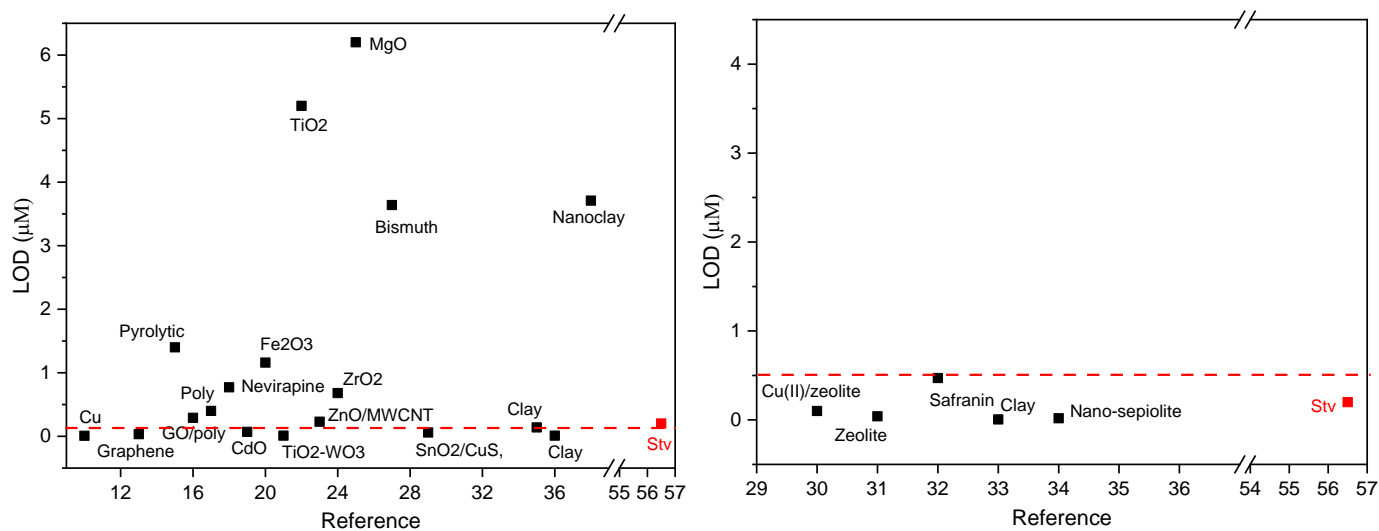

**Fig. S11.** LOD of several electrodes. Note the scale change in both figures.
